# Supplementary material for: Contrasting role of NLRP12 in autoinflammation: evidence from a case report and mouse models
Source: HighWire-hosted journal article supplement (doi:10.1136/rmdopen-2021-001824), 2021-10-01
Supplement: rmdopen-2021-001824supp004_data_supplement.pdf [file rmdopen-2021-001824supp004_data_supplement.pdf]

**Suppl. Table II. *NLRP12* variant characteristics**

|                                         |                       |
|-----------------------------------------|-----------------------|
| Genomic position <sup>a</sup>           | Chr19:54314056        |
| Coding sequence alteration <sup>b</sup> | c.857C>T              |
| Amino acid alteration                   | p.Pro286Leu           |
| Allele count in the gnomAD database     | 40                    |
| Allele frequency in the gnomAD database | 1.42x10 <sup>-4</sup> |
| SIFT <sup>c</sup>                       | 0                     |
| LRT <sup>d</sup>                        | 0.015882              |
| GERP++ <sup>e</sup>                     | 4.47                  |
| PhyloP <sup>f</sup>                     | 0.944                 |
| Polyphen <sup>g</sup>                   | 0.877                 |
| CADD <sup>h</sup>                       | 23.1                  |

Predictive analyses were performed with GATK analysis toolkit (Ref PMID: 20644199) and CADD (Ref PMID: 30371827)

<sup>a</sup> Positions refer to Hg19 (GRCh37).

<sup>b</sup> Positions refer to GenBank transcript NM\_144687.4.

<sup>c</sup> Function prediction tool based on protein sequence conservation among homologs. Variants with scores between 0 and 0.05 are considered deleterious.

<sup>d</sup> DNA sequence evolutionary model expressed as a p-value.

<sup>e</sup> GERP++NR score: DNA conservation score.

<sup>f</sup> Vertebrate PhyloP scores. Values vary between -20 and +9.873. Sites predicted to be conserved are assigned positive scores, while sites predicted to be fast-evolving are assigned negative scores.

<sup>g</sup> Polyphen2\_HDIV\_score: variants with scores between 0.85 and 1.0 are predicted to be damaging with high confidence.

<sup>h</sup> CADDv1.3 scores ranges from 1 to 99, with a higher score indicating greater deleteriousness.
